# Supplementary material
Source: PubMed Central journal article supplement (PMC2903808)
Supplement: supp_M006205_jlr.M006205-1.pdf [file supp_M006205_jlr.M006205-1.pdf]

**Supplementary Table 1. Genotype Distribution of *FADS1-FADS2* polymorphism in the HELENA study**

|           |    | Athens<br>(Greece) | Dortmund<br>(Germany) | Gent<br>(Belgium) | Heraklion<br>(Crete) | Lille<br>(France) | Pecs<br>(Hungary) | Roma<br>(Italy) | Stockholm<br>(Sweden) | Vienna<br>(Austria) | Zaragoza<br>(Spain) |
|-----------|----|--------------------|-----------------------|-------------------|----------------------|-------------------|-------------------|-----------------|-----------------------|---------------------|---------------------|
| rs174546  | 11 | 73 (0.57)          | 59 (0.48)             | 45 (0.40)         | 56 (0.49)            | 48 (0.50)         | 64 (0.47)         | 44 (0.50)       | 58 (0.50)             | 54 (0.46)           | 57 (0.50)           |
|           | 12 | 45 (0.35)          | 56 (0.45)             | 50 (0.45)         | 53 (0.48)            | 37 (0.38)         | 62 (0.45)         | 34 (0.38)       | 46 (0.40)             | 52 (0.45)           | 44 (0.39)           |
|           | 22 | 10 (0.08)          | 9 (0.07)              | 17 (0.15)         | 3 (0.03)             | 12 (0.12)         | 11 (0.08)         | 11 (0.12)       | 11 (0.10)             | 11 (0.09)           | 13 (0.11)           |
| rs968567  | 11 | 89 (0.70)          | 89 (0.72)             | 69 (0.62)         | 76 (0.70)            | 64 (0.66)         | 102 (0.75)        | 69 (0.77)       | 80 (0.69)             | 81 (0.69)           | 84 (0.74)           |
|           | 12 | 32 (0.25)          | 32 (0.26)             | 35 (0.31)         | 33 (0.30)            | 29 (0.30)         | 32 (0.23)         | 19 (0.21)       | 33 (0.29)             | 33 (0.28)           | 25 (0.22)           |
|           | 22 | 7 (0.05)           | 3 (0.02)              | 8 (0.07)          | 0 (0.00)             | 4 (0.04)          | 3 (0.02)          | 2 (0.02)        | 2 (0.02)              | 3 (0.03)            | 5 (0.04)            |
| rs174570  | 11 | 114 (0.89)         | 95 (0.77)             | 88 (0.78)         | 94 (0.85)            | 79 (0.81)         | 105 (0.77)        | 68 (0.76)       | 93 (0.81)             | 90 (0.77)           | 84 (0.74)           |
|           | 12 | 14 (0.11)          | 28 (0.22)             | 21 (0.19)         | 15 (0.14)            | 14 (0.15)         | 31 (0.22)         | 19 (0.21)       | 21 (0.18)             | 27 (0.23)           | 27 (0.24)           |
|           | 22 | 0 (0.00)           | 1 (0.01)              | 3 (0.03)          | 1 (0.01)             | 4 (0.04)          | 1 (0.01)          | 3 (0.03)        | 1 (0.01)              | 0 (0.00)            | 3 (0.02)            |
| rs174572  | 11 | 82 (0.64)          | 75 (0.61)             | 58 (0.52)         | 64 (0.58)            | 57 (0.59)         | 83 (0.61)         | 52 (0.58)       | 71 (0.62)             | 67 (0.57)           | 68 (0.60)           |
|           | 12 | 35 (0.27)          | 45 (0.36)             | 46 (0.41)         | 44 (0.40)            | 35 (0.36)         | 48 (0.35)         | 32 (0.35)       | 38 (0.33)             | 45 (0.39)           | 39 (0.34)           |
|           | 22 | 11 (0.09)          | 4 (0.03)              | 8 (0.07)          | 2 (0.02)             | 5 (0.05)          | 6 (0.04)          | 6 (0.07)        | 6 (0.05)              | 5 (0.04)            | 7 (0.06)            |
| rs2072113 | 11 | 113 (0.88)         | 98 (0.79)             | 81 (0.72)         | 89 (0.82)            | 79 (0.82)         | 104 (0.76)        | 73 (0.81)       | 91 (0.79)             | 96 (0.82)           | 94 (0.82)           |
|           | 12 | 15 (0.12)          | 23 (0.19)             | 28 (0.25)         | 19 (0.18)            | 14 (0.14)         | 33 (0.24)         | 14 (0.16)       | 22 (0.19)             | 20 (0.17)           | 19 (0.17)           |
|           | 22 | 0 (0.00)           | 3 (0.02)              | 3 (0.03)          | 0 (0.00)             | 4 (0.04)          | 0 (0.00)          | 3 (0.03)        | 2 (0.02)              | 1 (0.01)            | 1 (0.01)            |
| rs2072114 | 11 | 111 (0.87)         | 95 (0.77)             | 80 (0.71)         | 90 (0.82)            | 76 (0.78)         | 102 (0.74)        | 73 (0.81)       | 91 (0.79)             | 94 (0.80)           | 94 (0.82)           |
|           | 12 | 17 (0.13)          | 26 (0.21)             | 29 (0.26)         | 29 (0.18)            | 17 (0.18)         | 35 (0.26)         | 14 (0.16)       | 22 (0.19)             | 21 (0.18)           | 19 (0.17)           |
|           | 22 | 0 (0.00)           | 3 (0.02)              | 3 (0.03)          | 0 (0.00)             | 4 (0.04)          | 0 (0.00)          | 3 (0.03)        | 2 (0.02)              | 2 (0.02)            | 1 (0.01)            |
| rs174587  | 11 | 86 (0.67)          | 82 (0.66)             | 71 (0.63)         | 67 (0.61)            | 63 (0.65)         | 96 (0.70)         | 57 (0.64)       | 76 (0.66)             | 72 (0.62)           | 73 (0.64)           |
|           | 12 | 32 (0.25)          | 39 (0.32)             | 36 (0.32)         | 42 (0.38)            | 29 (0.30)         | 38 (0.28)         | 30 (0.33)       | 36 (0.31)             | 41 (0.35)           | 35 (0.31)           |
|           | 22 | 10 (0.08)          | 3 (0.02)              | 5 (0.05)          | 1 (0.01)             | 5 (0.05)          | 3 (0.02)          | 3 (0.03)        | 3 (0.03)              | 4 (0.03)            | 6 (0.05)            |
| rs174589  | 11 | 87 (0.68)          | 77 (0.65)             | 67 (0.62)         | 67 (0.61)            | 62 (0.65)         | 93 (0.69)         | 53 (0.61)       | 70 (0.67)             | 71 (0.61)           | 68 (0.63)           |
|           | 12 | 31 (0.24)          | 38 (0.32)             | 36 (0.34)         | 41 (0.37)            | 29 (0.30)         | 39 (0.29)         | 31 (0.36)       | 32 (0.30)             | 42 (0.36)           | 33 (0.31)           |
|           | 22 | 10 (0.08)          | 3 (0.03)              | 4 (0.04)          | 3 (0.02)             | 5 (0.05)          | 3 (0.02)          | 3 (0.03)        | 3 (0.03)              | 3 (0.03)            | 6 (0.06)            |
| rs174602  | 11 | 75 (0.59)          | 78 (0.64)             | 69 (0.64)         | 63 (0.59)            | 50 (0.52)         | 82 (0.60)         | 47 (0.52)       | 78 (0.70)             | 69 (0.59)           | 82 (0.73)           |
|           | 12 | 46 (0.36)          | 36 (0.29)             | 34 (0.31)         | 41 (0.38)            | 35 (0.36)         | 46 (0.34)         | 38 (0.42)       | 28 (0.25)             | 44 (0.38)           | 25 (0.22)           |
|           | 22 | 6 (0.05)           | 9 (0.07)              | 5 (0.05)          | 3 (0.03)             | 12 (0.12)         | 8 (0.06)          | 8 (0.06)        | 5 (0.05)              | 4 (0.03)            | 5 (0.05)            |
| rs498793  | 11 | 46 (0.36)          | 57 (0.46)             | 56 (0.50)         | 35 (0.32)            | 40 (0.41)         | 43 (0.31)         | 27 (0.30)       | 33 (0.29)             | 43 (0.37)           | 39 (0.35)           |
|           | 12 | 63 (0.49)          | 49 (0.39)             | 44 (0.39)         | 58 (0.53)            | 38 (0.39)         | 70 (0.51)         | 49 (0.54)       | 60 (0.53)             | 52 (0.44)           | 49 (0.43)           |
|           | 22 | 19 (0.15)          | 18 (0.15)             | 12 (0.11)         | 17 (0.15)            | 19 (0.20)         | 24 (0.18)         | 14 (0.16)       | 21 (0.18)             | 22 (0.19)           | 25 (0.22)           |
| rs526126  | 11 | 83 (0.65)          | 77 (0.62)             | 67 (0.60)         | 66 (0.63)            | 61 (0.63)         | 97 (0.71)         | 61 (0.68)       | 70 (0.61)             | 73 (0.63)           | 80 (0.70)           |
|           | 12 | 40 (0.31)          | 44 (0.36)             | 39 (0.35)         | 34 (0.33)            | 29 (0.30)         | 34 (0.25)         | 26 (0.29)       | 40 (0.35)             | 37 (0.32)           | 32 (0.28)           |
|           | 22 | 5 (0.04)           | 3 (0.02)              | 5 (0.05)          | 4 (0.04)             | 7 (0.07)          | 6 (0.04)          | 3 (0.03)        | 4 (0.04)              | 6 (0.05)            | 2 (0.02)            |
| rs174611  | 11 | 67 (0.52)          | 61 (0.49)             | 50 (0.45)         | 58 (0.53)            | 54 (0.56)         | 74 (0.54)         | 50 (0.55)       | 58 (0.51)             | 64 (0.55)           | 63 (0.55)           |
|           | 12 | 45 (0.35)          | 57 (0.46)             | 51 (0.45)         | 46 (0.42)            | 40 (0.41)         | 54 (0.39)         | 35 (0.39)       | 51 (0.44)             | 43 (0.37)           | 42 (0.37)           |
|           | 22 | 16 (0.13)          | 6 (0.05)              | 11 (0.10)         | 6 (0.05)             | 3 (0.03)          | 9 (0.07)          | 5 (0.06)        | 6 (0.05)              | 10 (0.08)           | 9 (0.08)            |
| rs174616  | 11 | 36 (0.28)          | 35 (0.28)             | 27 (0.24)         | 25 (0.23)            | 32 (0.33)         | 39 (0.29)         | 21 (0.23)       | 34 (0.30)             | 34 (0.29)           | 28 (0.24)           |
|           | 12 | 62 (0.48)          | 65 (0.53)             | 56 (0.50)         | 51 (0.47)            | 49 (0.51)         | 70 (0.51)         | 45 (0.50)       | 60 (0.52)             | 56 (0.48)           | 60 (0.53)           |
|           | 22 | 30 (0.24)          | 23 (0.19)             | 29 (0.26)         | 33 (0.30)            | 16 (0.16)         | 28 (0.20)         | 24 (0.27)       | 21 (0.18)             | 27 (0.23)           | 26 (0.23)           |

Data are N (frequency).

**Supplementary Table 2. LCPUFA values according to genotypes.**

|                  | 11           | 12           | 22           | <i>p</i> <sup>*</sup> |
|------------------|--------------|--------------|--------------|-----------------------|
| <b>rs174546</b>  |              |              |              |                       |
| C18:2n-6         | 21.50 (2.49) | 22.44 (2.41) | 23.42 (2.59) | 1.9E-18               |
| C18:3n-6         | 0.09 (0.04)  | 0.08 (0.03)  | 0.08 (0.02)  | 0.0001                |
| C20:3n-6         | 2.85 (0.63)  | 3.09 (0.69)  | 3.20 (0.76)  | 3.7E-12               |
| C20:4n-6         | 10.37 (1.51) | 9.24 (1.37)  | 7.89 (1.23)  | 7.1E-69               |
| C18:3n-3         | 0.13 (0.07)  | 0.14 (0.08)  | 0.19 (0.10)  | 2.0E-13               |
| C18:4n-3         | 0.05 (0.07)  | 0.05 (0.09)  | 0.04 (0.02)  | 0.43                  |
| C20:5n-3         | 0.51 (0.31)  | 0.48 (0.32)  | 0.46 (0.37)  | 4.2E-06               |
| C22:6n-3         | 2.99 (0.97)  | 2.90 (0.90)  | 2.89 (0.99)  | 0.006                 |
| <b>rs968567</b>  |              |              |              |                       |
| C18:2n-6         | 21.88 (2.61) | 22.41 (2.36) | 23.16 (2.14) | 1.5E-05               |
| C18:3n-6         | 0.09 (0.04)  | 0.08 (0.03)  | 0.08 (0.02)  | 0.04                  |
| C20:3n-6         | 2.88 (0.65)  | 3.22 (0.68)  | 3.43 (0.67)  | 3.1E-18               |
| C20:4n-6         | 9.95 (1.63)  | 9.10 (1.40)  | 8.19 (1.32)  | 3.8E-19               |
| C18:3n-3         | 0.13 (0.07)  | 0.15 (0.08)  | 0.19 (0.11)  | 2.3E-07               |
| C18:4n-3         | 0.05 (0.07)  | 0.06 (0.11)  | 0.04 (0.02)  | 0.35                  |
| C20:5n-3         | 0.50 (0.32)  | 0.46 (0.31)  | 0.44 (0.18)  | 0.0004                |
| C22:6n-3         | 2.97 (0.96)  | 2.88 (0.89)  | 3.07 (0.96)  | 0.08                  |
| <b>rs174570</b>  |              |              |              |                       |
| C18:2n-6         | 21.85 (2.49) | 22.79 (2.50) | 23.82 (3.99) | 1.8E-08               |
| C18:3n-6         | 0.09 (0.04)  | 0.08 (0.03)  | 0.08 (0.02)  | 0.01                  |
| C20:3n-6         | 2.99 (0.66)  | 2.98 (0.74)  | 2.58 (0.80)  | 0.42                  |
| C20:4n-6         | 9.91 (1.59)  | 8.87 (1.42)  | 7.39 (0.86)  | 4.5E-28               |
| C18:3n-3         | 0.14 (0.07)  | 0.15 (0.08)  | 0.19 (0.10)  | 0.0001                |
| C18:4n-3         | 0.05 (0.08)  | 0.05 (0.07)  | 0.04 (0.01)  | 0.48                  |
| C20:5n-3         | 0.49 (0.30)  | 0.47 (0.34)  | 0.55 (0.59)  | 0.02                  |
| C22:6n-3         | 2.95 (0.94)  | 2.92 (0.93)  | 3.00 (1.36)  | 0.24                  |
| <b>rs174572</b>  |              |              |              |                       |
| C18:2n-6         | 21.70 (2.56) | 22.46 (2.48) | 23.37 (2.16) | 1.5E-10               |
| C18:3n-6         | 0.09 (0.04)  | 0.08 (0.03)  | 0.08 (0.03)  | 0.003                 |
| C20:3n-6         | 2.88 (0.66)  | 3.11 (0.70)  | 3.30 (0.63)  | 1.9E-11               |
| C20:4n-6         | 10.13 (1.59) | 9.10 (1.43)  | 8.24 (1.31)  | 2.2E-36               |
| C18:3n-3         | 0.13 (0.07)  | 0.15 (0.08)  | 0.18 (0.10)  | 2.2E-11               |
| C18:4n-3         | 0.05 (0.07)  | 0.05 (0.09)  | 0.04 (0.02)  | 0.77                  |
| C20:5n-3         | 0.51 (0.30)  | 0.48 (0.34)  | 0.43 (0.27)  | 2.0E-05               |
| C22:6n-3         | 3.00 (0.97)  | 2.88 (0.90)  | 2.88 (0.89)  | 0.004                 |
| <b>rs2072114</b> |              |              |              |                       |
| C18:2n-6         | 21.83 (2.50) | 22.92 (2.58) | 23.06 (2.55) | 1.2E-09               |
| C18:3n-6         | 0.09 (0.04)  | 0.08 (0.02)  | 0.08 (0.03)  | 0.04                  |
| C20:3n-6         | 2.96 (0.68)  | 3.04 (0.66)  | 3.27 (1.05)  | 0.03                  |
| C20:4n-6         | 9.91 (1.59)  | 8.90 (1.43)  | 7.24 (0.70)  | 2.5E-26               |
| C18:3n-3         | 0.14 (0.07)  | 0.15 (0.07)  | 0.23 (0.09)  | 0.0004                |
| C18:4n-3         | 0.05 (0.08)  | 0.05 (0.07)  | 0.05 (0.02)  | 0.61                  |
| C20:5n-3         | 0.49 (0.31)  | 0.48 (0.35)  | 0.56 (0.40)  | 0.06                  |
| C22:6n-3         | 2.97 (0.94)  | 2.86 (0.96)  | 2.97 (0.84)  | 0.08                  |

**Supplementary Table 2 (continued). LCPUFA values according to genotypes.**

|                 | 11           | 12           | 22           | p <sup>*</sup> |
|-----------------|--------------|--------------|--------------|----------------|
| <b>rs174589</b> |              |              |              |                |
| C18:2n-6        | 21.81 (2.48) | 22.40 (2.57) | 23.49 (2.30) | 1.2E-07        |
| C18:3n-6        | 0.09 (0.04)  | 0.08 (0.03)  | 0.08 (0.03)  | 0.01           |
| C20:3n-6        | 2.91 (0.66)  | 3.11 (0.72)  | 3.33 (0.60)  | 5.5E-09        |
| C20:4n-6        | 10.03 (1.60) | 9.21 (1.50)  | 8.03 (1.34)  | 3.4E-25        |
| C18:3n-3        | 0.13 (0.07)  | 0.14 (0.08)  | 0.18 (0.11)  | 6.9E-07        |
| C18:4n-3        | 0.05 (0.07)  | 0.05 (0.10)  | 0.05 (0.02)  | 0.39           |
| C20:5n-3        | 0.50 (0.31)  | 0.47 (0.34)  | 0.41 (0.18)  | 0.0002         |
| C22:6n-3        | 2.95 (0.95)  | 2.90 (0.91)  | 2.91 (0.96)  | 0.08           |
| <b>rs174602</b> |              |              |              |                |
| C18:2n-6        | 21.78 (2.53) | 22.34 (2.50) | 23.54 (2.56) | 1.0E-09        |
| C18:3n-6        | 0.09 (0.04)  | 0.09 (0.03)  | 0.08 (0.02)  | 0.09           |
| C20:3n-6        | 2.98 (0.68)  | 2.99 (0.68)  | 3.01 (0.71)  | 0.86           |
| C20:4n-6        | 9.90 (1.58)  | 9.38 (1.61)  | 8.97 (1.79)  | 1.2E-12        |
| C18:3n-3        | 0.13 (0.07)  | 0.14 (0.08)  | 0.17 (0.11)  | 0.002          |
| C18:4n-3        | 0.05 (0.09)  | 0.05 (0.05)  | 0.05 (0.02)  | 0.76           |
| C20:5n-3        | 0.50 (0.31)  | 0.49 (0.34)  | 0.41 (0.26)  | 0.006          |
| C22:6n-3        | 3.01 (1.01)  | 2.87 (0.83)  | 2.71 (0.76)  | 0.06           |
| <b>rs498793</b> |              |              |              |                |
| C18:2n-6        | 22.22 (2.55) | 22.13 (2.58) | 21.54 (2.42) | 0.01           |
| C18:3n-6        | 0.09 (0.03)  | 0.09 (0.04)  | 0.09 (0.04)  | 0.16           |
| C20:3n-6        | 2.97 (0.67)  | 3.01 (0.70)  | 2.97 (0.66)  | 0.87           |
| C20:4n-6        | 9.50 (1.66)  | 9.70 (1.57)  | 9.99 (1.67)  | 0.003          |
| C18:3n-3        | 0.14 (0.08)  | 0.14 (0.08)  | 0.13 (0.06)  | 0.09           |
| C18:4n-3        | 0.05 (0.06)  | 0.09 (0.04)  | 0.05 (0.06)  | 0.75           |
| C20:5n-3        | 0.49 (0.35)  | 0.47 (0.29)  | 0.53 (0.31)  | 0.03           |
| C22:6n-3        | 2.92 (0.89)  | 2.90 (0.93)  | 3.12 (1.06)  | 0.08           |
| <b>rs526126</b> |              |              |              |                |
| C18:2n-6        | 21.96 (2.58) | 22.17 (2.50) | 22.85 (2.45) | 0.003          |
| C18:3n-6        | 0.09 (0.04)  | 0.09 (0.03)  | 0.08 (0.02)  | 0.11           |
| C20:3n-6        | 2.94 (0.67)  | 3.06 (0.69)  | 3.01 (0.72)  | 0.04           |
| C20:4n-6        | 9.84 (1.67)  | 9.37 (1.52)  | 9.25 (1.44)  | 1.3E-05        |
| C18:3n-3        | 0.14 (0.07)  | 0.15 (0.08)  | 0.15 (0.06)  | 0.04           |
| C18:4n-3        | 0.05 (0.09)  | 0.05 (0.04)  | 0.05 (0.02)  | 0.07           |
| C20:5n-3        | 0.50 (0.31)  | 0.48 (0.33)  | 0.52 (0.35)  | 0.02           |
| C22:6n-3        | 2.96 (0.96)  | 2.91 (0.91)  | 3.04 (0.93)  | 0.24           |
| <b>rs174611</b> |              |              |              |                |
| C18:2n-6        | 21.76 (2.61) | 22.37 (2.44) | 22.51 (2.49) | 6.1E-05        |
| C18:3n-6        | 0.09 (0.04)  | 0.08 (0.03)  | 0.08 (0.02)  | 0.003          |
| C20:3n-6        | 2.92 (0.66)  | 3.04 (0.70)  | 3.18 (0.69)  | 0.0002         |
| C20:4n-6        | 10.08 (1.62) | 9.26 (1.49)  | 9.02 (1.70)  | 9.3E-18        |
| C18:3n-3        | 0.13 (0.07)  | 0.15 (0.08)  | 0.16 (0.10)  | 0.0002         |
| C18:4n-3        | 0.05 (0.06)  | 0.05 (0.10)  | 0.04 (0.02)  | 0.45           |
| C20:5n-3        | 0.51 (0.31)  | 0.47 (0.32)  | 0.47 (0.28)  | 0.01           |
| C22:6n-3        | 2.96 (0.96)  | 2.90 (0.92)  | 3.08 (0.88)  | 0.94           |
| <b>rs174616</b> |              |              |              |                |
| C18:2n-6        | 21.49 (2.59) | 22.26 (2.44) | 22.28 (2.65) | 3.2E-05        |
| C18:3n-6        | 0.09 (0.04)  | 0.09 (0.04)  | 0.09 (0.03)  | 0.11           |
| C20:3n-6        | 2.92 (0.64)  | 2.97 (0.68)  | 3.09 (0.72)  | 0.02           |
| C20:4n-6        | 10.26 (1.57) | 9.52 (1.54)  | 9.34 (1.72)  | 4.9E-15        |
| C18:3n-3        | 0.13 (0.06)  | 0.14 (0.08)  | 0.14 (0.08)  | 0.03           |
| C18:4n-3        | 0.05 (0.07)  | 0.05 (0.09)  | 0.05 (0.02)  | 0.80           |
| C20:5n-3        | 0.52 (0.30)  | 0.48 (0.32)  | 0.48 (0.34)  | 0.004          |
| C22:6n-3        | 3.08 (1.01)  | 2.89 (0.94)  | 2.92 (0.85)  | 0.05           |

Major allele : 1, minor allele : 2 . Data are mean (SD). The fatty acids are in percent of total fatty acids. p value is for trend. \*p values were adjusted for age, gender, BMI and center.

**Supplementary Table 3. Lipids levels and BMI according to genotypes.**

|                            | 11           | 12           | 22           | <i>p</i> * |
|----------------------------|--------------|--------------|--------------|------------|
| <b>rs174546</b>            |              |              |              |            |
| Total cholesterol (mmol/l) | 4.19 (0.71)  | 4.12 (0.70)  | 4.15 (0.74)  | 0.13       |
| HDL (mmol/l)               | 1.44 (0.28)  | 1.43 (0.27)  | 1.40 (0.26)  | 0.07       |
| LDL (mmol/l)               | 2.45 (0.64)  | 2.43 (0.62)  | 2.47 (0.63)  | 0.90       |
| Triglyceride (mmol/l)      | 0.78 (0.37)  | 0.77 (0.37)  | 0.82 (0.40)  | 0.65       |
| BMI (kg/m <sup>2</sup> )   | 21.46 (3.76) | 21.19 (3.68) | 21.15 (3.91) | 0.70       |
| <b>rs968567</b>            |              |              |              |            |
| Total cholesterol (mmol/l) | 4.17 (0.72)  | 4.12 (0.67)  | 4.20 (0.77)  | 0.31       |
| HDL (mmol/l)               | 1.43 (0.28)  | 1.42 (0.28)  | 1.39 (0.25)  | 0.21       |
| LDL (mmol/l)               | 2.44 (0.63)  | 2.43 (0.60)  | 2.59 (0.76)  | 0.67       |
| Triglyceride (mmol/l)      | 0.78 (0.38)  | 0.78 (0.37)  | 0.77 (0.35)  | 0.99       |
| BMI (kg/m <sup>2</sup> )   | 21.39 (3.74) | 21.05 (3.71) | 22.06 (4.41) | 0.73       |
| <b>rs174570</b>            |              |              |              |            |
| Total cholesterol (mmol/l) | 4.17 (0.71)  | 4.12 (0.71)  | 4.15 (0.73)  | 0.37       |
| HDL (mmol/l)               | 1.43 (0.28)  | 1.42 (0.27)  | 1.46 (0.24)  | 0.35       |
| LDL (mmol/l)               | 2.45 (0.64)  | 2.41 (0.61)  | 2.48 (0.50)  | 0.76       |
| Triglyceride (mmol/l)      | 0.78 (0.37)  | 0.79 (0.40)  | 0.78 (0.34)  | 0.55       |
| BMI (kg/m <sup>2</sup> )   | 21.40 (3.80) | 21.09 (3.56) | 20.05 (3.61) | 0.22       |
| <b>rs174572</b>            |              |              |              |            |
| Total cholesterol (mmol/l) | 4.19 (0.71)  | 4.11 (0.70)  | 4.16 (0.73)  | 0.14       |
| HDL (mmol/l)               | 1.43 (0.27)  | 1.43 (0.28)  | 1.40 (0.27)  | 0.36       |
| LDL (mmol/l)               | 2.45 (0.64)  | 2.41 (0.60)  | 2.54 (0.70)  | 0.89       |
| Triglyceride (mmol/l)      | 0.79 (0.37)  | 0.77 (0.38)  | 0.79 (0.35)  | 0.58       |
| BMI (kg/m <sup>2</sup> )   | 21.36 (3.70) | 21.19 (3.78) | 21.75 (4.12) | 0.75       |
| <b>rs2072114</b>           |              |              |              |            |
| Total cholesterol (mmol/l) | 4.17 (0.71)  | 4.07 (0.70)  | 4.49 (0.90)  | 0.40       |
| HDL (mmol/l)               | 1.44 (0.28)  | 1.39 (0.25)  | 1.42 (0.33)  | 0.02       |
| LDL (mmol/l)               | 2.44 (0.64)  | 2.42 (0.61)  | 2.53 (0.61)  | 0.93       |
| Triglyceride (mmol/l)      | 0.78 (0.37)  | 0.79 (0.40)  | 0.98 (0.51)  | 0.08       |
| BMI (kg/m <sup>2</sup> )   | 21.4 (3.80)  | 20.93 (3.36) | 21.64 (5.35) | 0.71       |
| <b>rs174589</b>            |              |              |              |            |
| Total cholesterol (mmol/l) | 4.18 (0.71)  | 4.10 (0.69)  | 4.22 (0.73)  | 0.27       |
| HDL (mmol/l)               | 1.43 (0.28)  | 1.43 (0.27)  | 1.43 (0.26)  | 0.94       |
| LDL (mmol/l)               | 2.45 (0.63)  | 2.40 (0.61)  | 2.57 (0.71)  | 0.92       |
| Triglyceride (mmol/l)      | 0.79 (0.38)  | 0.76 (0.35)  | 0.76 (0.33)  | 0.45       |
| BMI (kg/m <sup>2</sup> )   | 21.40 (3.73) | 21.21 (3.79) | 21.35 (3.76) | 0.44       |

**Supplementary Table 3 (continued). Lipids levels and BMI according to genotypes.**

|                            | 11           | 12           | 22           | <i>p</i> * |
|----------------------------|--------------|--------------|--------------|------------|
| <b>rs174602</b>            |              |              |              |            |
| Total cholesterol (mmol/l) | 4.15 (0.69)  | 4.17 (0.75)  | 4.21 (0.77)  | 0.29       |
| HDL (mmol/l)               | 1.42 (0.27)  | 1.43 (0.29)  | 1.46 (0.26)  | 0.15       |
| LDL (mmol/l)               | 2.43 (0.63)  | 2.47 (0.64)  | 2.43 (0.61)  | 0.52       |
| Triglyceride (mmol/l)      | 0.78 (0.37)  | 0.79 (0.40)  | 0.75 (0.33)  | 0.91       |
| BMI (kg/m <sup>2</sup> )   | 21.31 (3.75) | 21.29 (3.70) | 21.65 (4.05) | 0.86       |
| <b>rs498793</b>            |              |              |              |            |
| Total cholesterol (mmol/l) | 4.16 (0.74)  | 4.14 (0.69)  | 4.20 (0.69)  | 0.62       |
| HDL (mmol/l)               | 1.43 (0.28)  | 1.43 (0.27)  | 1.43 (0.28)  | 1.00       |
| LDL (mmol/l)               | 2.43 (0.63)  | 2.44 (0.63)  | 2.46 (0.63)  | 0.56       |
| Triglyceride (mmol/l)      | 0.78 (0.35)  | 0.78 (0.37)  | 0.78 (0.44)  | 0.96       |
| BMI (kg/m <sup>2</sup> )   | 21.13 (3.43) | 21.48 (4.09) | 21.32 (3.43) | 0.55       |
| <b>rs526126</b>            |              |              |              |            |
| Total cholesterol (mmol/l) | 4.15 (0.69)  | 4.18 (0.73)  | 4.12 (0.75)  | 0.88       |
| HDL (mmol/l)               | 1.42 (0.27)  | 1.45 (0.28)  | 1.43 (0.28)  | 0.17       |
| LDL (mmol/l)               | 2.45 (0.63)  | 2.44 (0.63)  | 2.41 (0.65)  | 0.37       |
| Triglyceride (mmol/l)      | 0.80 (0.39)  | 0.76 (0.34)  | 0.74 (0.39)  | 0.05       |
| BMI (kg/m <sup>2</sup> )   | 21.26 (3.57) | 21.39 (4.04) | 21.54 (3.98) | 0.46       |
| <b>rs174611</b>            |              |              |              |            |
| Total cholesterol (mmol/l) | 4.16 (0.70)  | 4.14 (0.71)  | 4.23 (0.77)  | 0.84       |
| HDL (mmol/l)               | 1.43 (0.28)  | 1.44 (0.27)  | 1.41 (0.29)  | 0.98       |
| LDL (mmol/l)               | 2.44 (0.62)  | 2.43 (0.63)  | 2.57 (0.69)  | 0.51       |
| Triglyceride (mmol/l)      | 0.79 (0.38)  | 0.77 (0.38)  | 0.82 (0.36)  | 0.61       |
| BMI (kg/m <sup>2</sup> )   | 21.39 (3.74) | 21.05 (3.60) | 22.40 (4.48) | 0.32       |
| <b>rs174616</b>            |              |              |              |            |
| Total cholesterol (mmol/l) | 4.19 (0.69)  | 4.13 (0.69)  | 4.18 (0.78)  | 0.88       |
| HDL (mmol/l)               | 1.43 (0.28)  | 1.43 (0.28)  | 1.41 (0.27)  | 0.99       |
| LDL (mmol/l)               | 2.45 (0.59)  | 2.41 (0.63)  | 2.50 (0.68)  | 0.47       |
| Triglyceride (mmol/l)      | 0.79 (0.38)  | 0.77 (0.38)  | 0.80 (0.36)  | 0.96       |
| BMI (kg/m <sup>2</sup> )   | 21.24 (3.67) | 21.09 (3.55) | 21.91 (4.20) | 0.10       |

Major allele : 1, minor allele : 2. Data are means (S.D). *p* value is for trend. \**p* values were adjusted for age, gender, BMI and center.

**Supplementary Table 4. Haplotype characteristics for 11-locus and 7-locus haplotypes**

|                            | rs174546 | rs968567 | rs174570 | rs174572 | rs2072114 | rs174589 | rs174602 | rs498793 | rs526126 | rs174611 | rs174616 | Frequency |
|----------------------------|----------|----------|----------|----------|-----------|----------|----------|----------|----------|----------|----------|-----------|
| <b>11-locus haplotypes</b> |          |          |          |          |           |          |          |          |          |          |          |           |
| Haplo. 1                   | C        | C        | C        | C        | A         | C        | T        | <u>C</u> | C        | T        | G        | 0.272     |
| Haplo. 2                   | C        | C        | C        | C        | A         | C        | T        | <u>T</u> | C        | T        | G        | 0.158     |
| Haplo. 3                   | C        | C        | C        | C        | A         | C        | T        | T        | C        | T        | <u>A</u> | 0.091     |
| Haplo. 4                   | <u>I</u> | <u>I</u> | <u>C</u> | <u>I</u> | A         | <u>I</u> | T        | T        | <u>G</u> | <u>C</u> | <u>A</u> | 0.056     |
| Haplo. 5                   | <u>I</u> | C        | <u>I</u> | <u>C</u> | <u>G</u>  | C        | T        | T        | C        | <u>C</u> | <u>A</u> | 0.026     |
| Haplo. 6                   | <u>I</u> | C        | <u>I</u> | <u>I</u> | A         | <u>I</u> | <u>C</u> | T        | <u>G</u> | <u>C</u> | <u>A</u> | 0.019     |
| Haplo. 7                   | C        | C        | C        | C        | A         | C        | T        | T        | <u>G</u> | <u>C</u> | <u>A</u> | 0.019     |
| Haplo. 8                   | <u>I</u> | <u>I</u> | C        | <u>I</u> | A         | <u>I</u> | <u>C</u> | T        | C        | <u>C</u> | <u>A</u> | 0.019     |
| Haplo. 9                   | C        | C        | C        | C        | A         | C        | <u>C</u> | T        | C        | T        | <u>A</u> | 0.018     |
| Haplo. 10                  | C        | C        | C        | C        | A         | C        | T        | <u>C</u> | C        | T        | <u>A</u> | 0.018     |
| Haplo. 11                  | <u>I</u> | <u>I</u> | C        | <u>I</u> | A         | <u>I</u> | T        | <u>C</u> | <u>G</u> | <u>C</u> | <u>A</u> | 0.016     |
| Haplo. 12                  | <u>I</u> | C        | <u>I</u> | C        | <u>G</u>  | C        | T        | T        | C        | T        | G        | 0.016     |
| Haplo. 13                  | C        | C        | C        | C        | A         | C        | T        | T        | C        | <u>C</u> | <u>A</u> | 0.014     |
| Haplo. 14                  | <u>I</u> | <u>I</u> | C        | <u>I</u> | A         | <u>I</u> | <u>C</u> | T        | <u>G</u> | <u>C</u> | <u>A</u> | 0.014     |
| Haplo. 15                  | C        | C        | C        | C        | A         | C        | <u>C</u> | T        | C        | T        | G        | 0.013     |
| Haplo. 16                  | C        | C        | C        | C        | A         | C        | <u>C</u> | <u>C</u> | C        | T        | G        | 0.011     |
| Haplo. 17                  | C        | C        | C        | C        | A         | C        | <u>C</u> | T        | <u>G</u> | <u>C</u> | <u>A</u> | 0.010     |
| Haplo. 18                  | C        | C        | C        | C        | A         | C        | <u>C</u> | T        | <u>G</u> | T        | <u>A</u> | 0.010     |
| <b>7-locus haplotypes</b>  |          |          |          |          |           |          |          |          |          |          |          |           |
| Haplo. 1                   | C        | C        | -        | -        | -         | -        | T        | <u>C</u> | C        | T        | G        | 0.270     |
| Haplo. 2                   | C        | C        | -        | -        | -         | -        | T        | T        | C        | T        | G        | 0.157     |
| Haplo. 3                   | C        | C        | -        | -        | -         | -        | T        | T        | C        | T        | <u>A</u> | 0.090     |
| Haplo. 4                   | <u>I</u> | <u>I</u> | -        | -        | -         | -        | T        | T        | <u>G</u> | <u>C</u> | <u>A</u> | 0.058     |
| Haplo. 5                   | <u>I</u> | C        | -        | -        | -         | -        | T        | T        | C        | <u>C</u> | <u>A</u> | 0.033     |
| Haplo. 6                   | <u>I</u> | C        | -        | -        | -         | -        | <u>C</u> | T        | <u>G</u> | <u>C</u> | <u>A</u> | 0.022     |
| Haplo. 7                   | C        | C        | -        | -        | -         | -        | T        | T        | <u>G</u> | <u>C</u> | <u>A</u> | 0.020     |
| Haplo. 8                   | <u>I</u> | <u>I</u> | -        | -        | -         | -        | <u>C</u> | T        | C        | <u>C</u> | <u>A</u> | 0.021     |
| Haplo. 9                   | C        | C        | -        | -        | -         | -        | <u>C</u> | T        | C        | T        | <u>A</u> | 0.022     |
| Haplo. 10                  | C        | C        | -        | -        | -         | -        | T        | <u>C</u> | C        | T        | <u>A</u> | 0.020     |
| Haplo. 11                  | <u>I</u> | <u>I</u> | -        | -        | -         | -        | T        | <u>C</u> | <u>G</u> | <u>C</u> | <u>A</u> | 0.015     |
| Haplo. 12                  | <u>I</u> | C        | -        | -        | -         | -        | T        | T        | C        | T        | G        | 0.013     |
| Haplo. 13                  | C        | C        | -        | -        | -         | -        | T        | T        | C        | <u>C</u> | <u>A</u> | 0.016     |
| Haplo. 14                  | <u>I</u> | <u>I</u> | -        | -        | -         | -        | <u>C</u> | T        | <u>G</u> | <u>C</u> | <u>A</u> | 0.012     |
| Haplo. 15                  | C        | C        | -        | -        | -         | -        | T        | T        | C        | T        | G        | 0.014     |
| Haplo. 16                  | C        | C        | -        | -        | -         | -        | <u>C</u> | <u>C</u> | C        | T        | G        | 0.011     |
| Haplo. 17                  | C        | C        | -        | -        | -         | -        | <u>C</u> | T        | <u>G</u> | <u>C</u> | <u>A</u> | 0.011     |
| Haplo. 18                  | C        | C        | -        | -        | -         | -        | <u>C</u> | T        | <u>G</u> | T        | <u>A</u> | 0.011     |

Minor alleles are underlined.

**Supplementary Table 5. Systematic exploration of haplotype association between the 7HtSNPs within FADS1-FADS2 and C18:2(n-6), C20:4(n-6), D6D and D5D activities**

| Variable        | Model           | AIC <sup>*</sup> | #par <sup>†</sup> | SNP number; SNPs                    |                 |
|-----------------|-----------------|------------------|-------------------|-------------------------------------|-----------------|
| <b>C18:2n-6</b> | <b>1</b>        | <b>0.000</b>     | <b>10</b>         | <b>3; 1 2 3</b>                     |                 |
|                 | 2               | 5.878            | 7                 | 2; 1 2                              |                 |
|                 | 3               | 6.257            | 8                 | 2; 1 3                              |                 |
|                 | 4               | 7.071            | 14                | 4; 1 2 3 5                          |                 |
|                 | 117             | 70.896           | 6                 | 1; 4                                |                 |
|                 | 118             | 71.006           | 6                 | 1; 5                                |                 |
|                 | 119             | 71.450           | 8                 | 2; 4 5                              |                 |
|                 | 120             | 73.845           | 5                 | 0; Chi-square= 83.845425 with 5 df  |                 |
|                 | <b>C20:4n-6</b> | <b>1</b>         | <b>0.000</b>      | <b>7</b>                            | <b>2; 1 2</b>   |
|                 |                 | <b>2</b>         | <b>1.041</b>      | <b>10</b>                           | <b>3; 1 2 3</b> |
| 3               |                 | 2.077            | 6                 | 1; 1                                |                 |
| 4               |                 | 2.228            | 8                 | 2; 1 6                              |                 |
| 5               |                 | 2.569            | 8                 | 2; 1 3                              |                 |
| 117             |                 | 207.993          | 8                 | 2; 4 5                              |                 |
| 118             |                 | 208.607          | 6                 | 1; 5                                |                 |
| 119             |                 | 222.633          | 6                 | 1; 4                                |                 |
| 120             |                 | 228.649          | 5                 | 0; Chi-square= 232.648735 with 2 df |                 |
| <b>D6D</b>      |                 | <b>1</b>         | <b>0.000</b>      | <b>11</b>                           | <b>3; 2 3 4</b> |
|                 | <b>2</b>        | <b>1.124</b>     | <b>8</b>          | <b>2; 2 3</b>                       |                 |
|                 | <b>3</b>        | <b>1.709</b>     | <b>10</b>         | <b>3; 1 2 3</b>                     |                 |
|                 | <b>4</b>        | <b>1.872</b>     | <b>13</b>         | <b>5; 1 2 3 4 7</b>                 |                 |
|                 | 5               | 2.663            | 12                | 4; 1 2 3 4                          |                 |
|                 | 6               | 2.757            | 13                | 4; 2 3 4 7                          |                 |
|                 | ...             |                  |                   |                                     |                 |
|                 | 57              | 21.647           | 12                | 5; 1 2 3 4 5                        |                 |
|                 | 58              | 25.554           | 6                 | 1; 3                                |                 |
|                 | 59              | 26.067           | 5                 | 0; Chi-square= 38.066540 with 6 df  |                 |
|                 | 60              | 26.213           | 8                 | 2; 1 3                              |                 |
|                 | 61              | 26.298           | 8                 | 2; 1 4                              |                 |
|                 | 119             | 36.759           | 13                | 4; 1 3 6 7                          |                 |
| 120             | 36.924          | 12               | 4; 1 5 6 7        |                                     |                 |
| <b>D5D</b>      | <b>1</b>        | <b>0.000</b>     | <b>7</b>          | <b>2; 1 2</b>                       |                 |
|                 | 2               | 2.444            | 10                | 3; 1 2 6                            |                 |
|                 | 3               | 2.810            | 10                | 3; 1 2 4                            |                 |
|                 | 4               | 4.559            | 10                | 3; 1 2 3                            |                 |
|                 | ...             |                  |                   |                                     |                 |
|                 | 117             | 135.307          | 8                 | 2; 4 5                              |                 |
|                 | 118             | 138.607          | 8                 | 2; 3 4                              |                 |
|                 | 119             | 148.445          | 5                 | 0; Chi-square= 152.445397 with 2 df |                 |
| 120             | 149.409         | 6                | 1; 4              |                                     |                 |

where 1 is rs174546, 2 is rs968567, 3 is rs174602, 4 is rs498793, 5 is rs526126, 6 is rs174611 and 7 is rs174616. \*Re-scaled AIC. All models with a re-scaled AIC ≤ 2 (in bold) could be considered as 'equivalent'. †Number of estimated regression parameters.
